# Supplementary material for: Image-Based Quantification of Benzoporphyrin Derivative Uptake, Localization, and Photobleaching in 3D Tumor Models, for Optimization of PDT Parameters
Source: PubMed Central journal article supplement — Theranostics. 2012 Sep 5;2(9):827–39. doi: 10.7150/thno.4334 (PMC3475211; doi:10.7150/thno.4334), 2012-09-05

## **Supplemental Figure Captions**

**Supplemental Figure 1: 40X Z-stacks of 3D AsPC-1 Nodules during Viability Assessment.** Images acquired from Z-stacks at four different Z-positions and 3D renderings of each whole Z-stack for AsPC-1 day 12 nodules receiving either no treatment or 5 J/cm<sup>2</sup> PDT (1.5 hours of BPD uptake) from fluorescence images obtained during viability assessment. All scale bars are 80 μm.

**Supplemental Figure 2: Nodule Size Distributions of AsPC-1 and PANC-1 Pre-Treatment.** Nodule volume histograms illustrating the distribution of acini sizes present at the time of imaging and treatment for (A) day 12 AsPC-1 and (B) day 10 PANC-1 cultures. The y-axis of each histogram gives the normalized object count, or the number of nodules that fall into each individual bin divided by the sum of all nodules in the distribution.

**Supplemental Figure 3: Comparison of Imaging-Based Viability Assessment to MTT Assay.** Comparison of PDT dose response curves (continuous irradiation) for OVCAR5 monolayer cultures as obtained by the MTT assay to that obtained by the imaging-based technique presented in this work and previously published by Rizvi et al. [9]. The agreement between the curves validates the use of the imaging-based method in monolayer cultures and suggests the technique is a plausible approach to treatment assessment in 3D cultures.

Supplemental Figures

Supplemental Figure 1

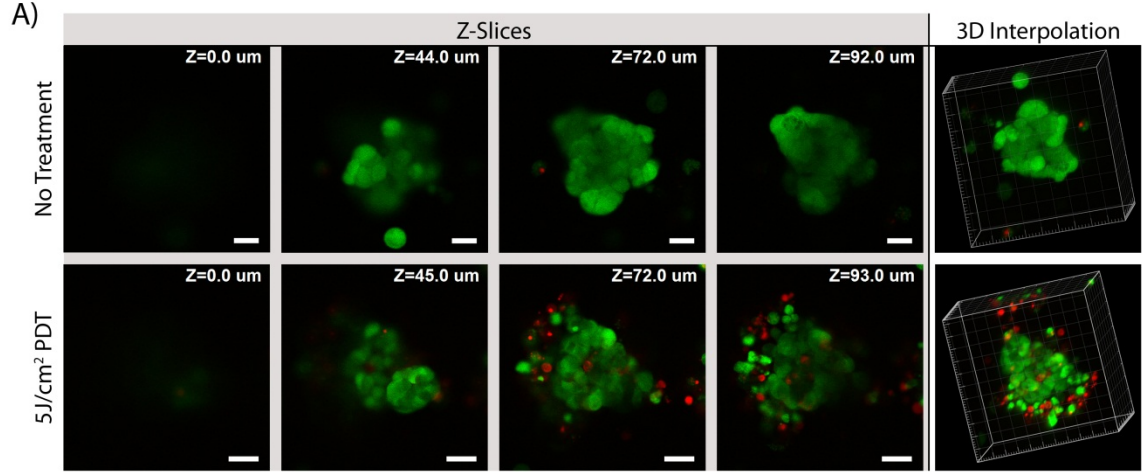

## Supplemental Figure 2

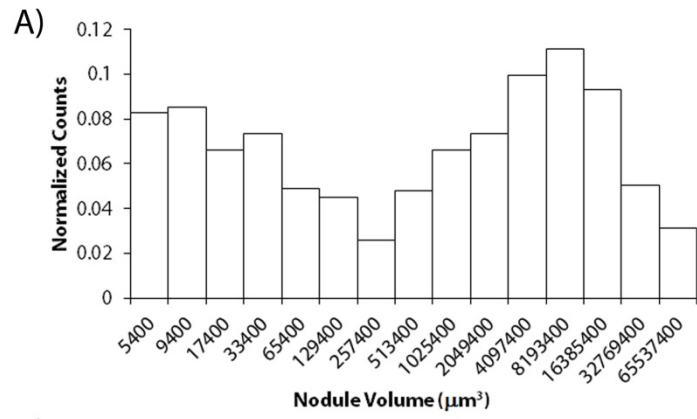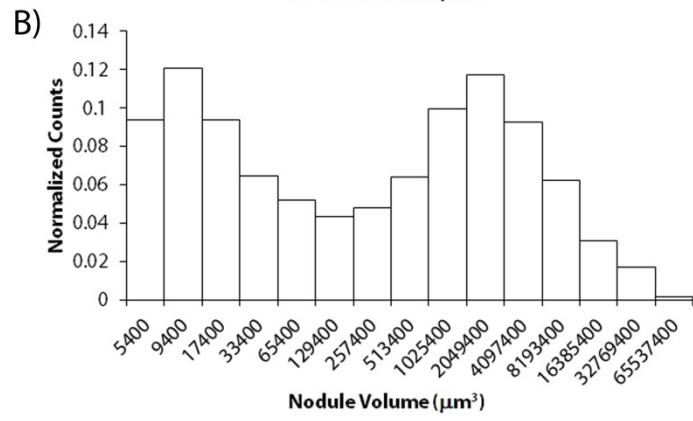

Supplemental Figure 3

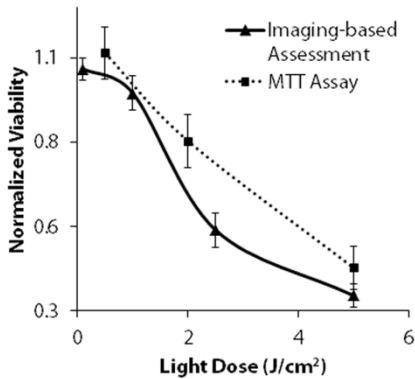

Supplement: thnov02p0827s1.pdf [file thnov02p0827s1.pdf]
